# Supplementary material for: Check dam impact on sediment loads: example of the Guerbe River in the Swiss Alps – a catchment scale experiment
Source: Copernicus journal article supplement (doi:10.5194/hess-28-1173-2024), 2024-03-07
Supplement: Supplementary file 1 [file hess-28-1173-2024-supplement.pdf]

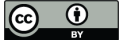

*Supplement of*

## **Check dam impact on sediment loads: example of the Guerbe River in the Swiss Alps – a catchment scale experiment**

**Ariel Henrique do Prado et al.**

*Correspondence to:* Ariel Henrique do Prado ([ariel.doprado@geo.unibe.ch](mailto:ariel.doprado@geo.unibe.ch))

The copyright of individual parts of the supplement might differ from the article licence.

## S1. Supplementary figures and tables

2 Here we illustrate an example of a digital surface model (DSM) and an orthomosaic image (Figs. S1)  
4 from the analyzed gravel bars, which we retrieved using the structure from motion photogrammetric processing  
6 of our UAV-derived images (Table S1). We provide an example of how we employed the Wolman grid  
8 approach to the orthomosaic images for conducting grain size measurements (Fig. S1). This is followed by an  
10 example where we show how the grain sizes were manually measured using the QGIS software (Fig. S2). The  
12 engineered slopes for all check dams in the Guerbe River are shown in the plot of Fig. S3. These slopes here  
were calculated using the LIDAR DEM SwissALTI3D from 2019 as a basis. The water discharge data, which  
has been recorded at the Burgistein gauging station, considers the period between 2009 and 2021; it is shown in  
Fig. S4. We also display aerial images taken between 1977 and 2021 (Figs. S5) from the Riselbruch, which is a  
hillslope in the knickpoint zone (see Fig. 2 of the main text). These images show the landslide activity in the  
region before and after the construction of the check dams.

Table S2 compiles the data as grain size percentiles and the slopes with a 95% confidence interval.  
This table also contains the coordinates in the WGS format together with the number of measured grains and  
information on the channel widths of each surveyed site. Table S3 shows the gamma distribution parameters  
fitted for the grain size percentiles. This was calculated using the method proposed by Mair et al. (2022, see  
reference in the main text) to propagate the errors related to the photogrammetric methods (see section 3.3.5 in  
the main text). Finally, in Table S4 we illustrate the results where we reconstruct the armour-breaking  
occurrence during the peak discharge in 2021. This is calculated for each surveyed site considering engineered  
and non-engineered states using the MP.M. and Reacking equations as a basis. We considered that the armour  
would be broken if the shear stress is large enough so that the  $D_{84}$  in riverbed can be entrained. We thus  
considered this to occur if the calculated bedload flux was larger than  $0.001 \text{ m}^3 \text{ s}^{-1}$  during the 2021 peak  
discharge.

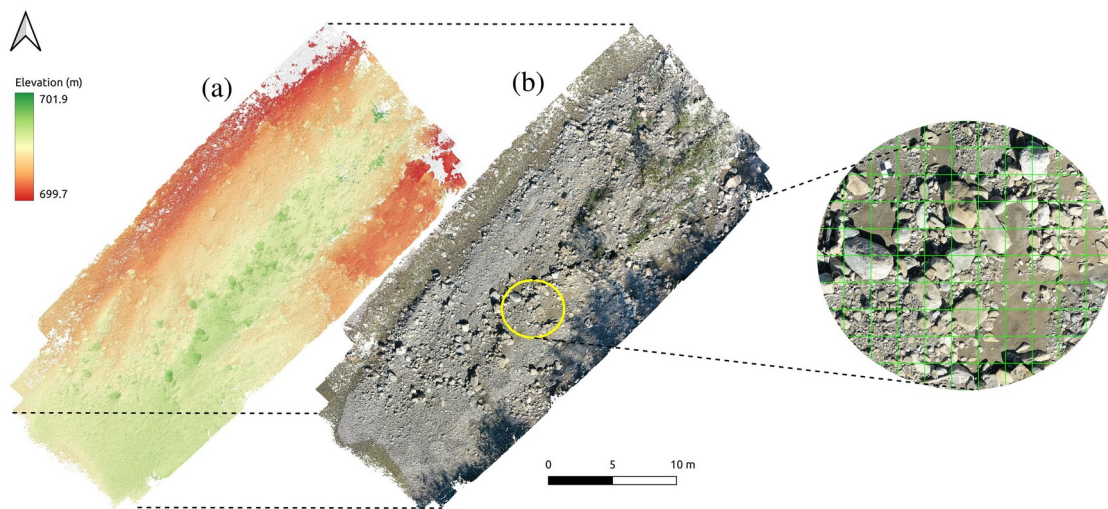

24 Figure S1. Examples of (a) a Digital Surface Model (DSM) and (b) an orthomosaic resulting from the  
26 photogrammetry processing. In the circle, there is an example of a Wolman grid with a spacing of 0.5 meters.  
The data were acquired in the Guerbe River (Site 9 in the main text) in 2021.

28

30

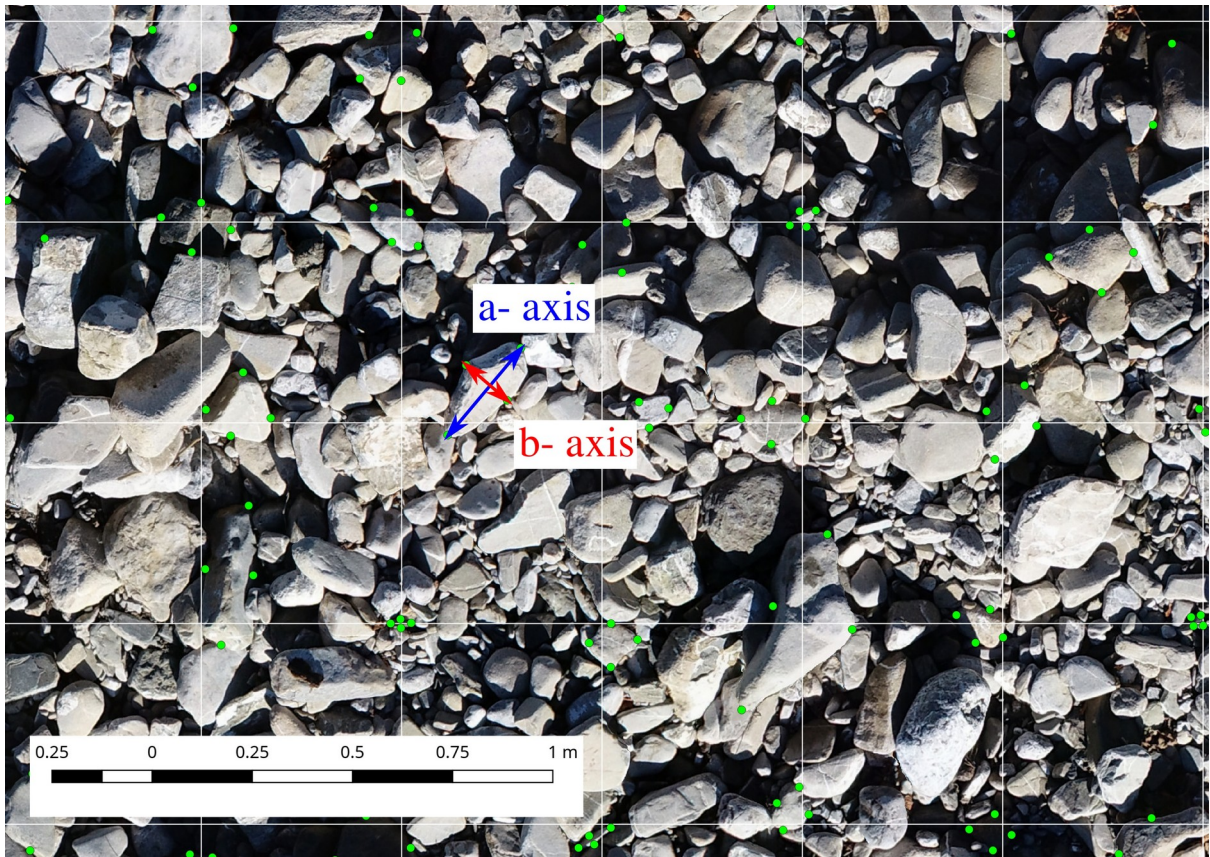

Figure S2. Example of how we measured the lengths of the a- and b- axes using the Qgis software.

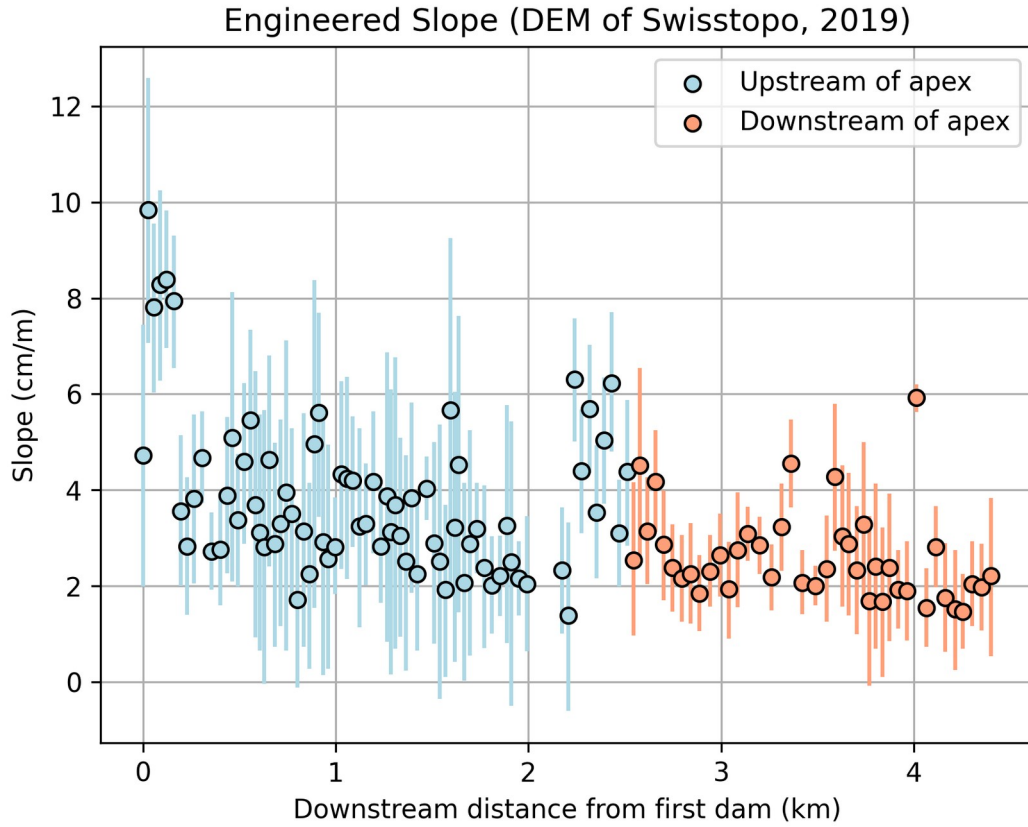

34 Figure S3. The engineered slopes of gravel bars between all check dams in the Guerbe River along with the 95% confidence interval (vertical lines). The slopes were measured using the 0.5 m grid resolution LiDAR DEM SwissALTI3D (Swisstopo, 2019) as a basis. The uncertainty in elevation for this DEM is 0.5 m.

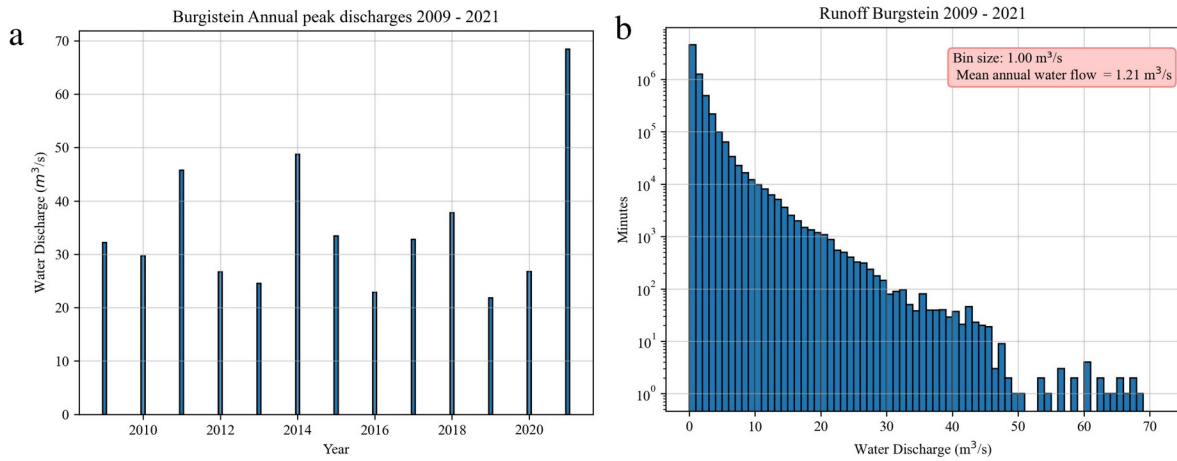

36 Figure S4. Discharge values measured at the Burgstein gauging station for the Guerbe River. (a) Values of  
 38 annual peak discharge for the period between 2009 and 2021. (b) Histogram with the discharge values ( $m^3/s$ )  
 that were measured every minute during the same period.

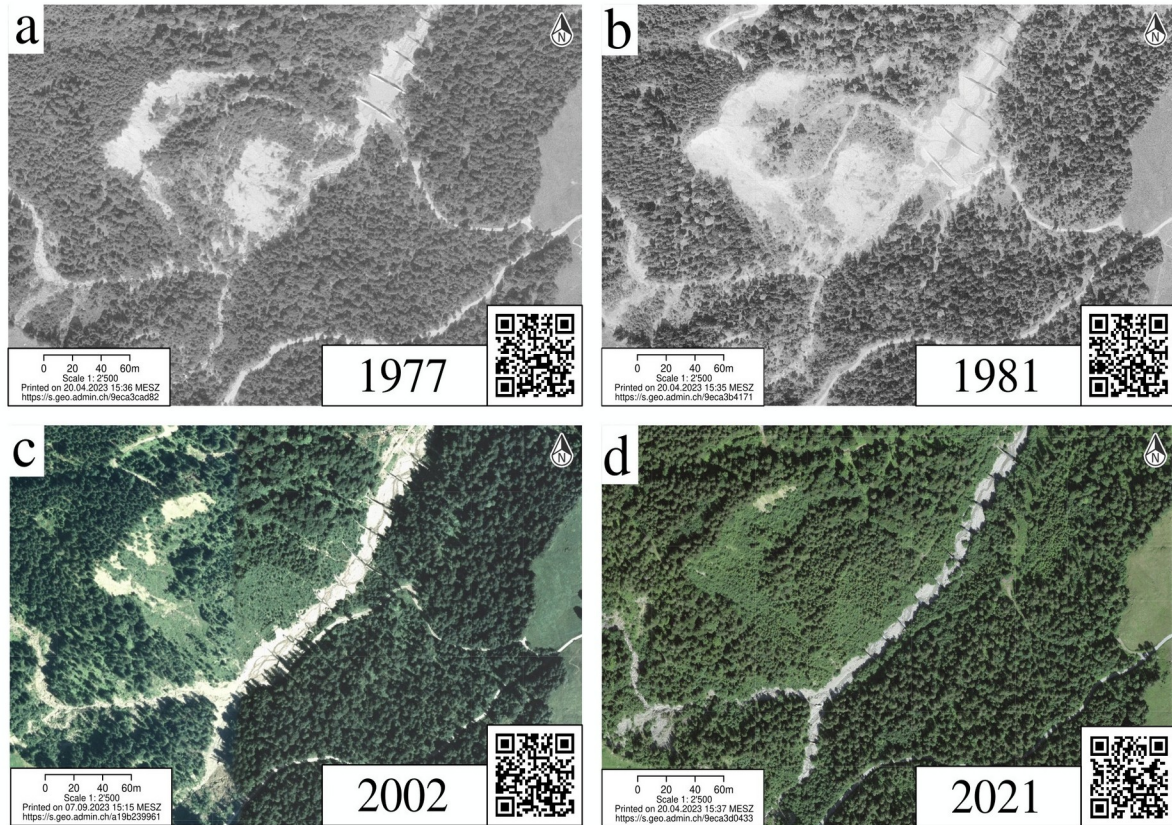

40 Figure S5. Temporal evolution of the Guerbe River over the last five decades at the Riselbruch (Knickpoint  
 42 zone indicated in the circle in Fig. 2 in the main text). (a) The aerial image taken in 1977 shows that a large  
 44 landslide situated upstream of the uppermost constructed check dam (on the northern side of the river) was  
 46 active. (b) In 1981, new check dams were under construction in this upstream area. (c) and (d) Aerial images  
 taken in 2002 and 2021 reveal that the landslide observed in (a) and (b) has stabilized after the construction  
 of the new check dams, leading to a gradual reforestation of the surrounding area. Copyright, Swiss federal  
 authorities. [http://www.disclaimer.admin.ch/terms\\_and\\_conditions.html](http://www.disclaimer.admin.ch/terms_and_conditions.html). © CNES, Spot Image, swisstopo,  
 NPOC.

Table S1: Summary of the UAV surveys and resulting SfM model uncertainties. RMSE = root mean square error, Std = standard deviation, px = pixel.

| Survey (Site)                                       | 1    | 2     | 3    | 4     | 5     | 6      | 7     | 8      | 9     | 10     | 11     | 12     | 13    |
|-----------------------------------------------------|------|-------|------|-------|-------|--------|-------|--------|-------|--------|--------|--------|-------|
| Flight height nominal (m)                           | 7.11 | 5.02  | 6.7  | 8.36  | 6.04  | 7.31   | 7.91  | 6.8    | 7     | 6.32   | 6.98   | 7.42   | 6.58  |
| Ground sampling distance (mm)                       | 1.5  | 1.47  | 1.42 | 1.83  | 1.41  | 1.6    | 1.7   | 1.45   | 1.5   | 1.37   | 1.52   | 1.59   | 1.63  |
| Number of images used                               | 35   | 43    | 46   | 142   | 91    | 130    | 269   | 190    | 212   | 141    | 87     | 87     | 180   |
| Image acquisition format                            | JPEG | JPEG  | JPEG | JPEG  | JPEG  | JPEG   | JPEG  | JPEG   | JPEG  | JPEG   | JPEG   | JPEG   | JPEG  |
| Number of used GCPs                                 | 10   | 10    | 5    | 8     | 8     | 10     | 10    | 10     | 10    | 10     | 10     | 8      | 8     |
| Control Point RMSE (mm)                             |      |       |      |       |       |        |       |        |       |        |        |        |       |
| X, Y                                                | 29   | 73.8  | 78.6 | 26.4  | 23.70 | 16.52  | 18.77 | 15.39  | 9.81  | 10.48  | 13.34  | 18.11  | 11.95 |
| Z                                                   | 13.5 | 31.7  | 37.1 | 10.5  | 9.37  | 19.27  | 28.20 | 11.74  | 13.33 | 6.06   | 7.42   | 25.76  | 41.96 |
| Check Point RMSE (mm)                               |      |       |      |       |       |        |       |        |       |        |        |        |       |
| X, Y                                                | 39.9 | 80.6  | -    | 22.2  | 30.27 | 21.64  | 15.36 | 17.59  | 23.64 | 17.11  | 13.38  | 23.46  | 15.20 |
| Z                                                   | 36.3 | 52.3  | -    | 1.5   | 57.03 | 28.95  | 41.67 | 8.22   | 18.07 | 17.83  | 18.43  | 30.03  | 52.96 |
| Tie Point Observation Distance (m)                  |      |       |      |       |       |        |       |        |       |        |        |        |       |
| Mean                                                | 7.2  | 4.65  | 6.28 | 8.29  | 5.94  | 7.21   | 7.23  | 6.28   | 6.49  | 5.83   | 6.48   | 6.87   | 5.98  |
| Std                                                 | 0.4  | 0.4   | 0.55 | 0.35  | 0.38  | 0.44   | 0.45  | 0.43   | 0.36  | 0.41   | 0.23   | 0.25   | 0.15  |
| Sparse point cloud precision (mm)                   |      |       |      |       |       |        |       |        |       |        |        |        |       |
| Mean Z                                              | 14.2 | 10.0  | 10.8 | 8.2   | 4.50  | 3.88   | 14.23 | 5.59   | 5.04  | 7.52   | 6.61   | 4.37   | 4.79  |
| Std Z                                               | 14.1 | 5.9   | 10.5 | 7.4   | 3.71  | 3.0    | 10.96 | 7.23   | 4.28  | 6.64   | 5.80   | 3.71   | 10.96 |
| Image error (px)                                    | 1.7  | 4.3   | 1.39 | 0.66  | 1.02  | 0.82   | 1.74  | 0.77   | 0.81  | 1.21   | 0.98   | 0.72   | 0.57  |
| Reprojection error RMSE (px)                        | 1    | 1.16  | 1.52 | 0.54  | 0.57  | 0.64   | 1.04  | 0.85   | 0.68  | 0.73   | 0.74   | 0.63   | 0.90  |
| Doming amplitude (m)                                | 0.08 | -0.08 | 0.16 | -0.06 | 0.051 | -0.009 | 0.081 | -0.032 | 0.019 | -0.011 | -0.018 | -0.035 | 0.008 |
| Orthophoto mosaic resolution (mm px <sup>-1</sup> ) | 2.84 | 2.29  | 2.74 | 3.67  | 2.81  | 3.2    | 3.41  | 2.89   | 3     | 2.73   | 3.04   | 3.19   | 3.26  |

50 Table S2. Grain sizes and slopes of Guerbe River bars along the engineered reach with the presence of the check dams (Map in Fig.1 of the main text).

| Site | Coordinates latitude (DD WGS 84) | Coordinates longitude (DD WGS 84) | Number of grains | D50 (cm) | D50 95% C.I. (cm) | D84 (cm) | D84 95% C.I. (cm) | Eng. Slope (m/m) | Eng. Slope 95% C.I. (m/m) | Non-eng. Slope (m/m) | Non-eng. Slope 95% C.I. (m/m) | Channel Width (m) |
|------|----------------------------------|-----------------------------------|------------------|----------|-------------------|----------|-------------------|------------------|---------------------------|----------------------|-------------------------------|-------------------|
| 1    | 7.4709                           | 46.7297                           | 475              | 8.13     | 7.06 - 9.38       | 26.73    | 23.58 - 30.02     | 9.7              | 8.6 - 11.0                | -                    | -                             | 16.4              |
| 2    | 7.4738                           | 46.7321                           | 458              | 6.36     | 5.80 - 6.89       | 16.47    | 14.39 - 18.94     | 4.9              | 4.5 - 5.2                 | 22.5                 | 22.3 - 22.7                   | 15.7              |
| 3    | 7.4773                           | 46.734                            | 811              | 5.44     | 5.10 - 5.78       | 11.10    | 10.36 - 11.85     | 3.3              | 3.0 - 3.7                 | 25.8                 | 25.6 - 26.0                   | 13.7              |
| 4    | 7.488                            | 46.7399                           | 696              | 7.38     | 6.72 - 8.00       | 18.54    | 16.51 - 21.49     | 2.2              | 2.2 - 2.4                 | 7.81                 | 7.74 - 7.92                   | 16.0              |
| 5    | 7.4891                           | 46.7405                           | 675              | 6.08     | 5.54 - 6.74       | 15.64    | 13.81 - 17.63     | 2.7              | 2.5 - 2.9                 | 16.6                 | 16.4 - 16.6                   | 16.4              |
| 6    | 7.4914                           | 46.741                            | 1145             | 4.20     | 3.95 - 4.46       | 12.63    | 11.06 - 14.65     | 2.7              | 2.2 - 3.2                 | 19.0                 | 18.7 - 19.3                   | 19.9              |
| 7    | 7.4987                           | 46.7428                           | 1450             | 4.29     | 4.04 - 4.56       | 16.48    | 14.76 - 18.08     | 0.039            | 0.037 - 0.040             | 0.105                | 0.101 - 0.107                 | 23.63             |
| 8    | 7.5018                           | 46.7432                           | 1170             | 4.49     | 4.26 - 4.75       | 10.27    | 9.56 - 10.98      | 0.031            | 0.030 - 0.034             | 0.086                | 0.084 - 0.088                 | 17.43             |
| 9    | 7.509                            | 46.7456                           | 1419             | 4.92     | 4.63 - 5.24       | 17.84    | 16.51 - 19.44     | 0.021            | 0.018 - 0.027             | 0.070                | 0.069 - 0.070                 | 15.01             |
| 10   | 7.5133                           | 46.748                            | 738              | 4.89     | 4.42 - 5.45       | 17.04    | 15.49 - 19.09     | 0.031            | 0.030 - 0.032             | 0.062                | 0.060 - 0.064                 | 15.22             |
| 11   | 7.516                            | 46.7508                           | 371              | 4.48     | 3.99 - 5.17       | 14.87    | 12.94 - 17.02     | 0.013            | 0.012 - 0.014             | 0.054                | 0.054 - 0.055                 | 15.84             |
| 12   | 7.5164                           | 46.7512                           | 494              | 3.67     | 3.36 - 4.00       | 8.64     | 7.85 - 9.68       | 0.020            | 0.018 - 0.021             | 0.059                | 0.057 - 0.060                 | 18.16             |
| 13   | 7.5191                           | 46.7553                           | 1427             | 3.32     | 3.15 - 3.52       | 9.34     | 8.76 - 9.92       | 0.015            | 0.013 - 0.017             | -                    | -                             | 20.0              |

52 Table S3. Gamma probability density function (PDFs) parameters for the uncertainty estimation using a combined bootstrapping and Monte Carlo error modelling for the grain size percentile values ( $D_{50}$  and  $D_{84}$ ).

| Site | $D_{50}$ Gamma A | $D_{50}$ Gamma Loc | $D_{50}$ Gamma Scale | $D_{84}$ Gamma A | $D_{84}$ Gamma Loc | $D_{84}$ Gamma Scale |
|------|------------------|--------------------|----------------------|------------------|--------------------|----------------------|
| 1    | 51.4             | 38.2               | 0.86                 | 83.8             | 109                | 1.92                 |
| 2    | 856              | -17.5              | 0.0947               | 43.6             | 93                 | 1.65                 |
| 3    | 1850             | -21.3              | 0.0409               | 759              | 3.97               | 0.141                |
| 4    | 1470             | -52.2              | 0.0859               | 13.8             | 138                | 3.54                 |
| 5    | 51.3             | 38.4               | 0.441                | 131              | 49.2               | 0.82                 |
| 6    | 404              | 16.2               | 0.064                | 25.4             | 79.4               | 1.86                 |
| 7    | 145              | 26.1               | 0.116                | 399              | -12.7              | 0.443                |
| 8    | 33100            | -173               | 0.00658              | 131              | 60.5               | 0.323                |
| 9    | 131              | 31.8               | 0.133                | 65.2             | 117                | 0.955                |
| 10   | 54.9             | 29.4               | 0.356                | 445              | -31.9              | 0.458                |
| 11   | 21.1             | 30.9               | 0.675                | 27.1             | 94.1               | 2.04                 |
| 12   | 86.9             | 21                 | 0.181                | 25.3             | 64.4               | 0.882                |
| 13   | 163              | 21.1               | 0.0755               | 1430             | -16.6              | 0.077                |

54

56



58 Table S4. Armour break occurrences during the peak discharge of 2021 for each surveyed site considering engineered and non-engineered scenarios and using the MP.M. and  
 60 Reacking equations as a basis. We considered that the armours will break if the shear stress is large enough so that the  $D_{84}$  in riverbed can be entrained. Therefore, we  
 considered such conditions if the calculated bedload flux is larger than  $0.001 \text{ m}^3 \text{ s}^{-1}$ .

| Site | Engineered MP.M. | Engineered Recking | Non-engineered MP.M. | Non-engineered Recking |
|------|------------------|--------------------|----------------------|------------------------|
| 1    | No               | No                 | No                   | No                     |
| 2    | No               | No                 | Yes                  | Yes                    |
| 3    | No               | Yes                | Yes                  | Yes                    |
| 4    | No               | No                 | Yes                  | Yes                    |
| 5    | No               | Yes                | Yes                  | Yes                    |
| 6    | No               | Yes                | Yes                  | Yes                    |
| 7    | No               | Yes                | Yes                  | Yes                    |
| 8    | Yes              | Yes                | No                   | Yes                    |
| 9    | No               | No                 | Yes                  | Yes                    |
| 10   | No               | Yes                | Yes                  | Yes                    |
| 11   | No               | No                 | Yes                  | Yes                    |
| 12   | Yes              | Yes                | Yes                  | Yes                    |
| 13   | No               | Yes                | No                   | Yes                    |

## 62 **S2. Workflow for the propagation of uncertainties upon estimating** 63 **the bedload flux**

64 The workflow for propagating the uncertainty comprises an estimation of the uncertainties of  
65 the initial parameters and an assessment of the uncertainty related to the bedload fluxes. Each  
66 parameter (grain size, channel slope, and width) follows a specific workflow:

- **Grain Sizes:**

68 • We employed the method developed by Mair et al. (2022) for estimating the  
69 uncertainties related to the measurements of grain sizes, utilizing survey-specific  
70 Structure-from-Motion (SfM) uncertainties (Table S1). This involved a routine  
71 combining bootstrapping and Monte Carlo simulation, which was conducted  
72 separately for each river bar.

73 • In each bootstrap scenario ( $n = 1000$ ), we resampled all measured grains, simulating  
74 distortions related to the survey-specific SfM for each grain (details in Mair et al.,  
75 2022). Upon bootstrapping, the  $D_{50}$  and  $D_{84}$  were stored for each scenario.

76 • After the bootstrap, we fitted all stored  $D_{50}$  and  $D_{84}$  values into a gamma distribution  
77 for a subsequent simulation and calculation of bedload fluxes through the Monte  
78 Carlo simulation framework. We justify the use of the gamma distribution due to the  
79 non-normality of the  $D_{50}$  and  $D_{84}$  distributions. The median, as well as the 95%  
80 confidence interval, were calculated for  $D_{50}$  and  $D_{84}$ s.

- **Slope:**

82 • Slope uncertainties were calculated by applying a bootstrap ( $n = 1000$ ) on the data  
83 that we collected at each surveyed site. For each scenario, the median slope was  
84 stored.

85 • After the bootstrap, we calculated the 95% confidence interval and fitted a normal  
86 distribution to the slope values.

- **Widths:**

88 • The uncertainties on the channel width data were estimated by assuming that the  
89 values are uniformly distributed. Here, we considered the range of measured widths  
90 at each side, and we assigned an uncertainty of  $\pm 10\%$  to these values.

### **Bedload Flux Uncertainties:**

92 • The uncertainties related to the bedload flux was determined using a Monte Carlo simulation  
93 ( $n = 1000$ ), where each scenario calculated the bedload flux using input parameters sampled  
94 from random variables (rsv function in Python). Here, we used the distribution of values that  
95 we estimated in the previous steps as a basis.

96 • The confidence intervals of the calculated bedload fluxes were then determined from these  
97 scenarios.
